# Supplementary figures and images for: Decreased LDHB expression in breast tumor cells causes NK cell activation and promotes tumor progression
Source: PubMed Central journal article supplement — Cancer Biol Med. 2024 Mar 25;21(6):513–40. doi: 10.20892/j.issn.2095-3941.2023.0382 (PMC11208901; doi:10.20892/j.issn.2095-3941.2023.0382), 2024-03-25

**A**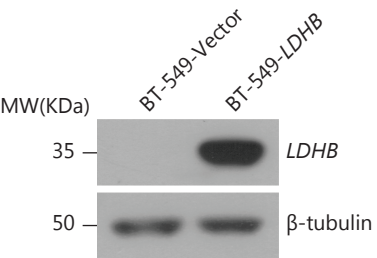**B**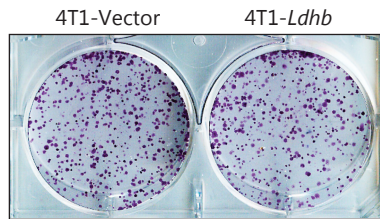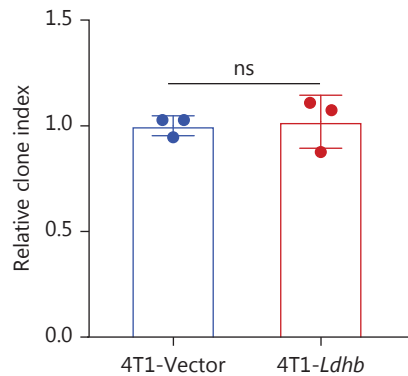**C**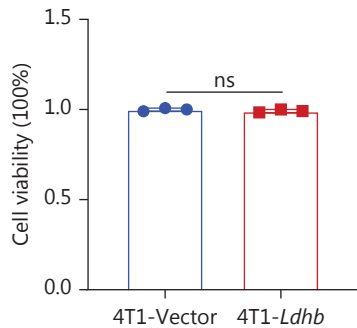

Supplement: cbm-21-513-s002.pdf [file cbm-21-513-s002.pdf]
